# Supplementary material
Source: PubMed Central journal article supplement (PMC7053230)
Supplement: ry191931suppa1.pdf [file ry191931suppa1.pdf]

**Table E1: Clinical diagnoses and exposures used for propensity score matching and predicting acute kidney injury**

| Category                              | Included diagnoses or drugs                                                                                                                                                                                                                                                                                             |
|---------------------------------------|-------------------------------------------------------------------------------------------------------------------------------------------------------------------------------------------------------------------------------------------------------------------------------------------------------------------------|
| Kidney disease, congenital            | Autosomal dominant polycystic kidney disease, autosomal recessive polycystic kidney disease, multicystic dysplastic kidney, renal agenesis, renal dysplasia, renal hypoplasia, vesicoureteral reflux                                                                                                                    |
| Kidney disease, acquired              | Acute glomerulonephritis, chronic glomerulonephritis, chronic kidney disease, chronic tubulointerstitial nephritis, nephrectomy, nephritis, nephropathy, nephrotic syndrome, obstructive uropathy, proteinuria, small kidney of unknown cause                                                                           |
| Vasopressor                           | Dobutamine, dopamine, epinephrine, norepinephrine, vasopressin                                                                                                                                                                                                                                                          |
| Nephrotoxin-Antibiotic                | Acyclovir, ambisome, amikacin, amphotericin B, cefotaxime, ceftazidime, cefuroxime, cidofovir, colistimethate, dapsone, foscarnet, ganciclovir, gentamicin, nafcillin, pentamidine, piperacillin, piperacillin-tazobactam, tenofovir, ticarcillin-clavulanic acid, tobramycin, valacyclovir, valganciclovir, vancomycin |
| Nephrotoxin-Antihypertensive/Diuretic | Captopril, chlorthalidone, enalapril, enalaprilat, hydrochlorothiazide, lisinopril, losartan, valsartan                                                                                                                                                                                                                 |
| Nephrotoxin-Analgesic                 | Aspirin, celecoxib, ibuprofen, indomethacin, ketorolac, mesalamine, naproxen, sulfasalazine                                                                                                                                                                                                                             |
| Nephrotoxin-Other                     | Carboplatin, cisplatin, cyclosporine, ifosfamide, lithium, methotrexate, mitomycin, pamidronate disodium, sirolimus, tacrolimus, topiramate, zoledronic acid, zonisamide                                                                                                                                                |

Included diagnoses are derived from the International Classification of Diseases [10th Revision]. Included drugs are derived from the Nephrotoxic Injury Negated by Just-in-time Action collaborative.

**Table E2: Summary of covariates used for propensity score matching for the iodinated contrast material exposed and unexposed patient samples before matching. Statistically significant *P* values in bold and italics. Parentheses contain percentages.**

| Variables                   | Pre-Imaging eGFR < 60 mL/min/1.73 m <sup>2</sup> |             |                    | Pre-Imaging eGFR ≥ 60 mL/min/1.73 m <sup>2</sup> |             |                         |
|-----------------------------|--------------------------------------------------|-------------|--------------------|--------------------------------------------------|-------------|-------------------------|
|                             | CT                                               | US          | <i>P</i> value     | CT                                               | US          | <i>P</i> value          |
| Total no. patients          | 36                                               | 106         | —                  | 1101                                             | 955         | —                       |
| Age (years)                 | 2.2 ± 4.9                                        | 3.1 ± 5.6   | 0.39               | 8.1 ± 6.1                                        | 7.4 ± 6.3   | <b><i>0.013</i></b>     |
| Female sex                  | 21 (58.3)                                        | 68 (64.2)   | 0.53               | 590 (53.6)                                       | 490 (51.3)  | 0.30                    |
| BMI (kg/m <sup>2</sup> )    | 16.1 ± 4.7                                       | 16.1 ± 5.9  | 0.97               | 19.3 ± 5.8                                       | 19.0 ± 5.2  | 0.22                    |
| LOS (days)                  | 35.42 ± 92.8                                     | 31.0 ± 39.2 | 0.78               | 21.2 ± 42.5                                      | 20.7 ± 36.3 | 0.81                    |
| LOS, ICU (days)             | 32.5 ± 89.3                                      | 23.7 ± 32.8 | 0.57               | 8.2 ± 24.5                                       | 9.3 ± 25.0  | 0.35                    |
| Hemoglobin (g/dL)           | 12.3 ± 3.1                                       | 11.9 ± 2.7  | 0.42               | 11.2 ± 2.2                                       | 11.1 ± 2.3  | 0.54                    |
| Hypertension                | 10 (27.8)                                        | 36 (34.0)   | 0.49               | 480 (43.6)                                       | 339 (35.5)  | <b><i>&lt;0.001</i></b> |
| Diabetes mellitus           | 3 (8.3)                                          | 4 (3.8)     | 0.27               | 83 (7.5)                                         | 61 (6.4)    | 0.31                    |
| Kidney disease, congenital* | 8 (22.2)                                         | 24 (22.6)   | 0.96               | 59 (5.4)                                         | 46 (4.8)    | 0.58                    |
| Kidney disease, acquired*   | 11 (30.6)                                        | 39 (36.8)   | 0.50               | 160 (14.5)                                       | 132 (13.8)  | 0.65                    |
| Sickle cell disease         | 0                                                | 1 (0.9)     | 0.56               | 20 (1.8)                                         | 20 (2.1)    | 0.65                    |
| Congenital heart disease    | 30 (83.3)                                        | 66 (62.3)   | <b><i>0.02</i></b> | 288 (26.2)                                       | 223 (23.4)  | 0.14                    |
| Congestive heart failure    | 6 (16.7)                                         | 20 (18.9)   | 0.77               | 68 (6.2)                                         | 58 (6.1)    | 0.92                    |
| History of cardiac arrest   | 4 (11.1)                                         | 7 (6.6)     | 0.38               | 30 (2.7)                                         | 30 (3.1)    | 0.58                    |

|                                        |           |           |      |            |            |                  |
|----------------------------------------|-----------|-----------|------|------------|------------|------------------|
| Shock                                  | 3 (8.3)   | 13 (12.3) | 0.52 | 128 (11.6) | 84 (8.8)   | 0.04             |
| SIRS/sepsis                            | 6 (16.7)  | 30 (28.3) | 0.17 | 177 (16.1) | 138 (14.5) | 0.31             |
| Mechanical ventilation                 | 0         | 4 (3.8)   | 0.24 | 15 (1.4)   | 12 (1.3)   | 0.83             |
| Vasopressor*                           | 5 (13.9)  | 15 (14.2) | 0.97 | 194 (17.6) | 123 (12.9) | <b>0.003</b>     |
| Blood transfusion                      | 9 (25.0)  | 17 (16.0) | 0.23 | 114 (10.4) | 85 (8.9)   | 0.27             |
| Nephrotoxin-antibiotic*                | 19 (52.8) | 57 (53.8) | 0.92 | 303 (27.5) | 246 (25.8) | 0.37             |
| Nephrotoxin-antihypertensive/diuretic* | 5 (13.9)  | 11 (10.4) | 0.56 | 97 (8.8)   | 75 (7.9)   | 0.43             |
| Nephrotoxin-analgesic*                 | 6 (16.7)  | 12 (11.3) | 0.40 | 240 (21.8) | 150 (15.7) | <b>&lt;0.001</b> |
| Nephrotoxin-other*                     | 4 (11.1)  | 13 (12.3) | 0.85 | 148 (13.4) | 90 (9.4)   | <b>0.005</b>     |

eGFR = estimated glomerular filtration rate; BMI = body mass index; LOS = length of stay; ICU = intensive care unit; SIRS = systemic inflammatory response syndrome.

\* See Table E1 for list of included diagnoses or medications.
